# Supplementary material for: Proteomic Analysis of Native Hepatocyte Nuclear Factor-4α (HNF4α) Isoforms, Phosphorylation Status, and Interactive Cofactors
Source: PubMed Central journal article supplement — J Biol Chem. 2010 Nov 3;286(1):674–86. doi: 10.1074/jbc.M110.154732 (PMC3013027; doi:10.1074/jbc.m110.154732), 2010-11-03

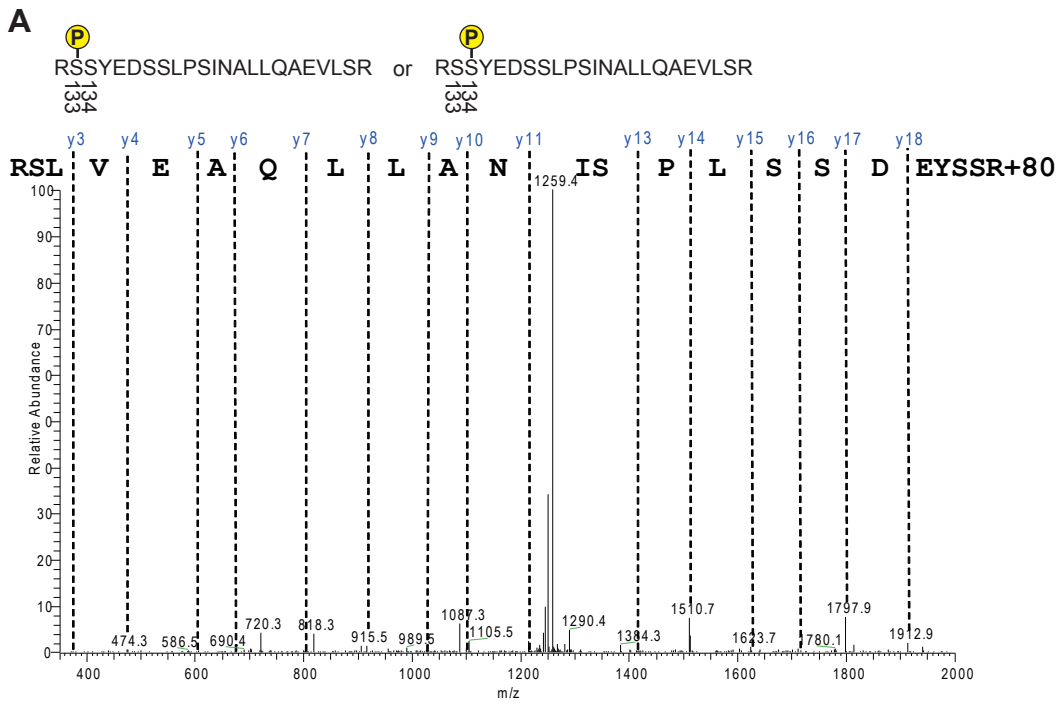

S133 or S134(precursor  $m/z$  1308.137(-1.44ppm))

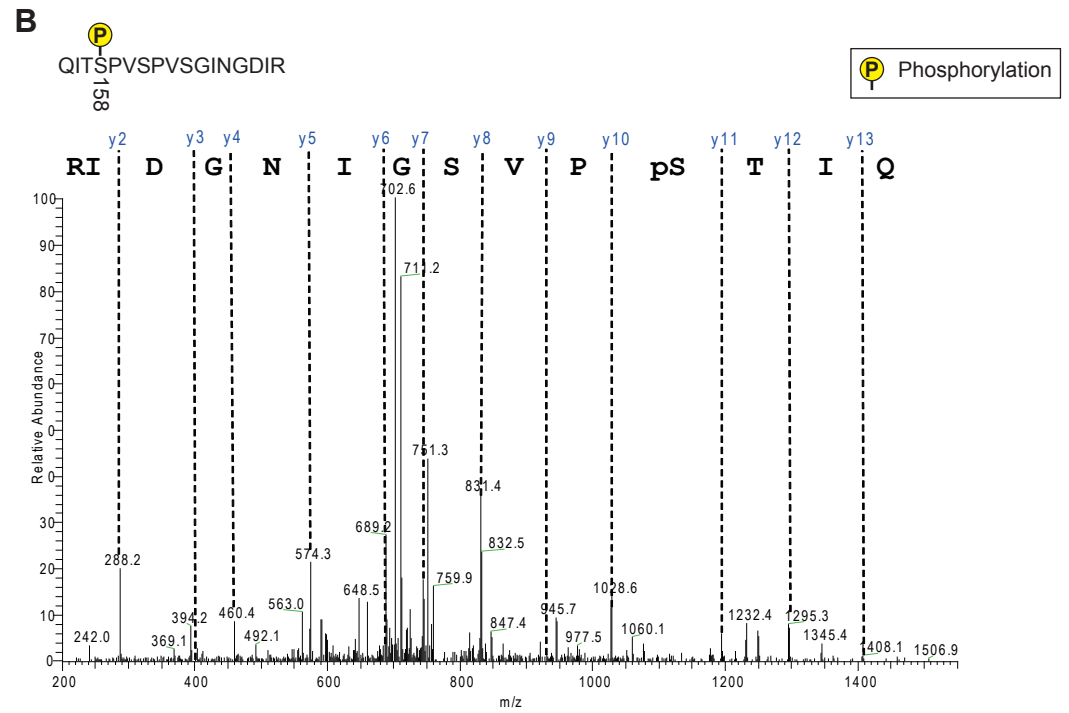

S158(precursor  $m/z$  768.870(+0.09ppm))

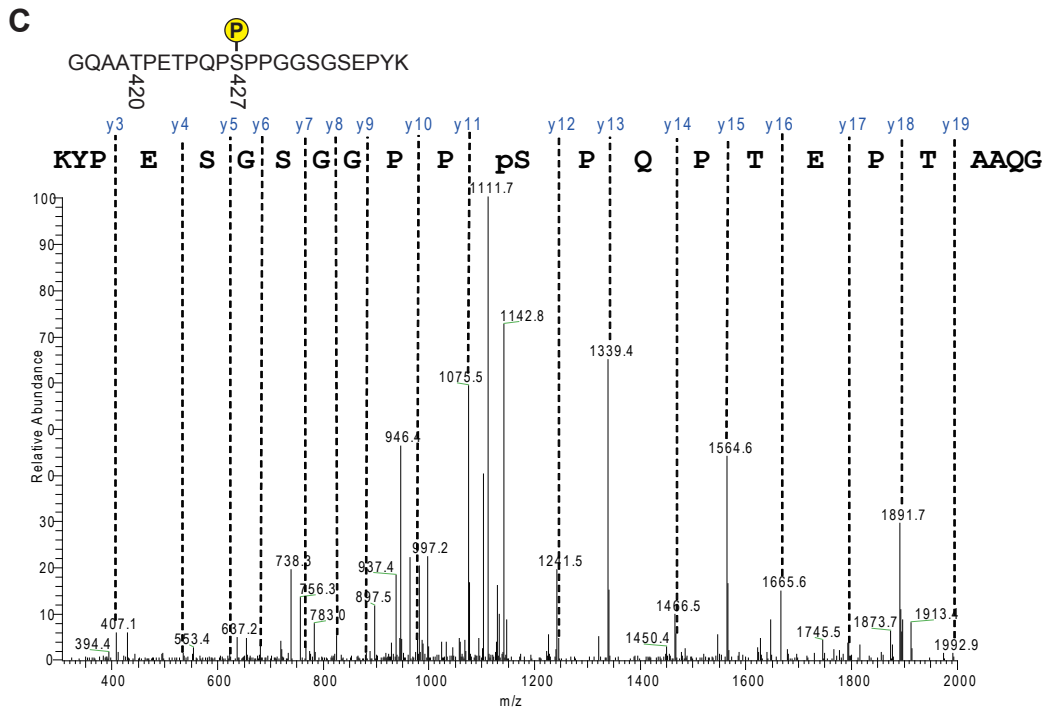

S427(precursor  $m/z$  1160.510(-0.85ppm))

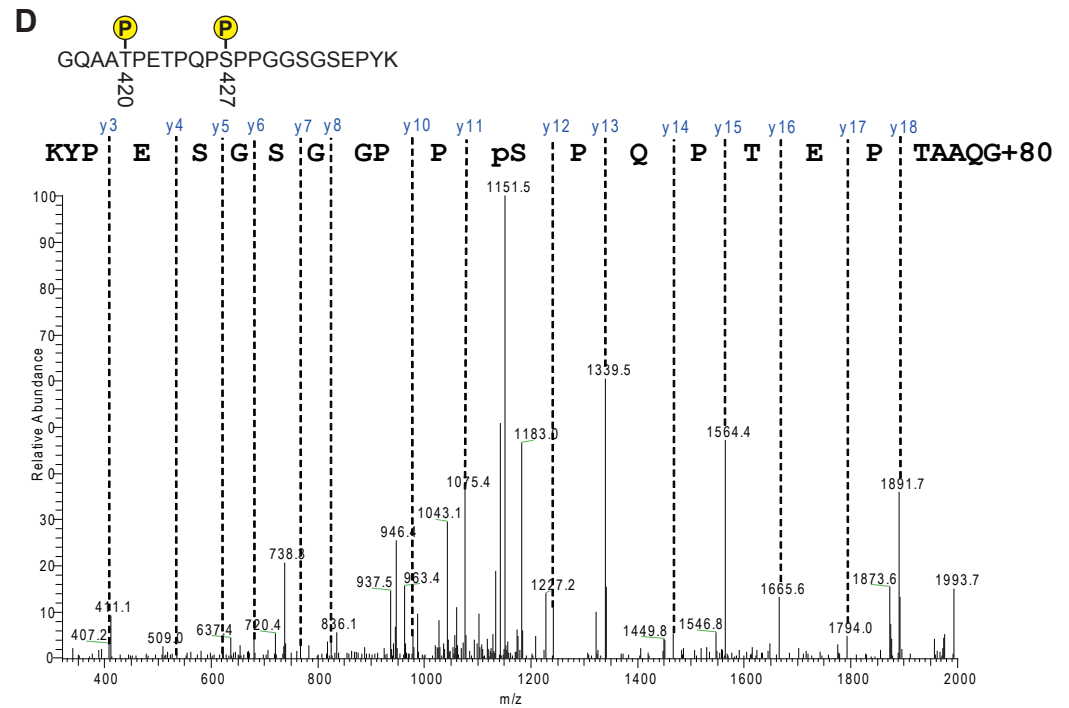

T420,S427(precursor  $m/z$  1200.490(-1.00ppm))

 Phosphorylation

| Input                                                                               | IP Antibody                    |                                  |           | Information of antibody for Immunoblotting |                                                       |
|-------------------------------------------------------------------------------------|--------------------------------|----------------------------------|-----------|--------------------------------------------|-------------------------------------------------------|
|                                                                                     | Anti-HNF4 $\alpha$<br>F domain | Anti-HNF4 $\alpha$<br>A/B domain | Mouse IgG |                                            |                                                       |
|    | 30%                            | 7.518                            | 11.300    | 0.005                                      | HNF4A<br>Anti-HNF4 $\alpha$                           |
|    | 30%                            | 0.090                            | 0.085     | 0.009                                      | HNF4A_HUMAN<br>F domain H1415                         |
|    | 30%                            | 0.068                            | 0.065     | 0.005                                      | PRKDC<br>DNA-PKcs (H-163): sc-9051                    |
|    | 30%                            | 0.089                            | 0.093     | 0.008                                      | PRKDC_HUMAN<br>santa cruz biotechnology, inc.         |
|    | 30%                            | 0.111                            | 0.115     | 0.018                                      | XRCC5<br>Ku-86 (H-300): sc-9034                       |
|    | 30%                            | 0.043                            | 0.065     | 0.003                                      | KU86_HUMAN<br>santa cruz biotechnology, inc.          |
|    | 30%                            | 0.045                            | 0.047     | 0.002                                      | XRCC6<br>Ku-70 (H-308): sc-9033                       |
|    | 30%                            | 0.144                            | 0.278     | 0.026                                      | KU70_HUMAN<br>santa cruz biotechnology, inc.          |
|   | 30%                            | 0.065                            | 0.067     | 0.006                                      | TRRAP<br>TRRAP (T-17): sc-5405                        |
|  | 30%                            | 0.065                            | 0.067     | 0.006                                      | TRRAP_HUMAN<br>santa cruz biotechnology, inc.         |
|  | 5%                             | 0.756                            | 0.033     | 0.005                                      | ACTL6A<br>BAF53 (N-19): sc-47808                      |
|  | 5%                             | 0.043                            | 0.065     | 0.003                                      | ACL6A_HUMAN<br>santa cruz biotechnology, inc.         |
|  | 5%                             | 0.045                            | 0.047     | 0.002                                      | SUPT16H<br>SPT16 (H-300): sc-28734                    |
|  | 5%                             | 0.045                            | 0.047     | 0.002                                      | SP16H_HUMAN<br>santa cruz biotechnology, inc.         |
|  | 5%                             | 0.279                            | 0.288     | 0.001                                      | HNF4G<br>Anti-HNF4 $\gamma$                           |
|  | 5%                             | 0.279                            | 0.288     | 0.001                                      | HNF4G_HUMAN<br>B6502A                                 |
|  | 30%                            | 0.144                            | 0.278     | 0.026                                      | PELP1<br>PELP1/MNAR Antibody: A300-180A               |
|  | 30%                            | 0.144                            | 0.278     | 0.026                                      | PELP1_HUMAN<br>Bethyl Laboratories, Inc.              |
|  | 30%                            | 0.065                            | 0.067     | 0.006                                      | TMPO<br>Rabbit Polyclonal anti-LAP 2 alpha: NB100-676 |
|  | 30%                            | 0.065                            | 0.067     | 0.006                                      | LAP2A_HUMAN<br>Novus Biologicals, Inc.                |
|  | 5%                             | 0.756                            | 0.033     | 0.005                                      | GIGYF2<br>GIGYF2 (H-95): sc-134708                    |
|  | 5%                             | 0.756                            | 0.033     | 0.005                                      | PERQ2_HUMAN<br>santa cruz biotechnology, inc.         |
|  | 30%                            | 0.032                            | 0.060     | 0.011                                      | EP300<br>p300 (N-15): sc-584                          |
|  | 30%                            | 0.032                            | 0.060     | 0.011                                      | EP300_HUMAN<br>santa cruz biotechnology, inc.         |

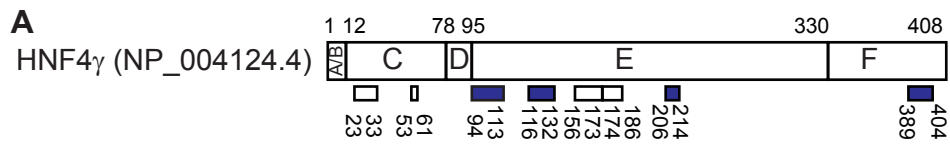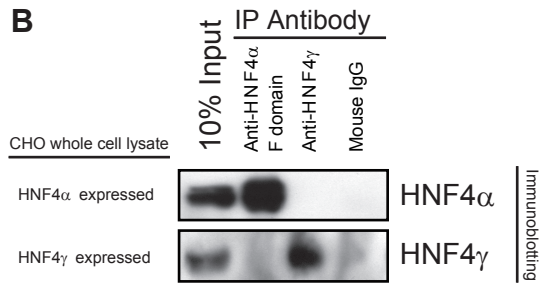

Supplement: supp_M110.154732_supplemental_Figures.pdf [file supp_M110.154732_supplemental_Figures.pdf]
